# Supplementary material
Source: publisher site journal article supplement (https://www.dovepress.com/article/312000)
Supplement: Supplementary file 1 [file get_supplementary_file.php]

**Supplementary Table 1 Spearman coefficient and *P* value between sub-dimension depression symptoms and other variables**

|  | **Disease onset-age** | **Disease duration** | **BMI** | **Education level** | **Sleep efficiency** | **Sleep latency** | **R%** | **N1+N2%** | **N3%** | **AHI** | **Arousal index** | **ESS** |
| --- | --- | --- | --- | --- | --- | --- | --- | --- | --- | --- | --- | --- |
| **Depressed affect**  ***P* value** | 0.143  0.196 | 0.156  0.158 | 0.155  0.163 | 0.273  0.013* | -0.025  0.824 | -0.15  0.175 | 0.028  0.803 | -0.047  0.676 | -0.037  0.738 | 0.084  0.449 | 0.009  0.937 | 0.257  0.019* |
| **Lack of positive affect**  ***P* value** | -0.055  0.619 | 0.191  0.083 | 0.191  0.085 | 0.07  0.528 | -0.163  0.14 | -0.068  0.541 | -0.087  0.432 | 0.058  0.599 | -0.027  0.808 | 0.106  0.338 | -0.155  0.161 | 0.097  0.385 |
| **Somatic symptoms**  ***P* value** | 0.123  0.269 | 0.033  0.77 | 0.110  0.323 | 0.151  0.173 | 0.042  0.708 | -0.156  0.159 | -0.087  0.435 | -0.061  0.583 | 0.05  0.651 | -0.053  0.634 | -0.087  0.433 | 0.244  0.026* |
| **Interpersonal problems**  ***P* value** | -0.106  0.341 | 0.364  0.001* | 0.236  0.032* | 0.213  0.053 | -0.172  0.121 | -0.063  0.573 | 0.039  0.728 | -0.095  0.391 | 0.006  0.954 | 0.274  0.012* | -0.103  0.352 | 0.341  0.002* |

Abbreviations: BMI, body mass index. AHI, apnea hypopnea index. ESS, Epworth sleepiness scale. * P < 0.05.
